# Supplementary material for: HKUST-1 loaded few-layer Ti3C2Tx for synergistic chemo-photothermal effects to enhance antibacterial activity
Source: Royal Society of Chemistry journal article supplement (doi:10.1039/d2tb02816f), 2023-01-01
Supplement: d2tb02816f1.pdf [file d2tb02816f1.pdf]

## Support information

# HKUST-1 Loaded Few-layer $\text{Ti}_3\text{C}_2\text{T}_x$ for Synergistic Chemo-Photothermal Effects to Enhance Antibacterial Activity

Lei Fang<sup>†,a</sup>, Yingjie Chen<sup>†,a</sup>, Wei Shan<sup>a</sup>, Tiankun Hui<sup>a</sup>, Ilham Mokni<sup>c</sup>, Jie Wu<sup>c</sup>, Chuanli Zhou<sup>\*,b</sup>,  
Liangmin Yu<sup>\*,a</sup>, Meng Qiu<sup>\*,a</sup>

<sup>a</sup> Key Laboratory of Marine Chemistry Theory and Technology (Ocean University of China), Ministry of Education, Qingdao 266100, China

<sup>b</sup> Department of Spine Surgery, Affiliated Hospital of Qingdao University, Qingdao, Shandong, P. R. China

<sup>c</sup> Department of Medicine, Zhejiang Chinese Medical University, Hangzhou, Zhejiang, China.

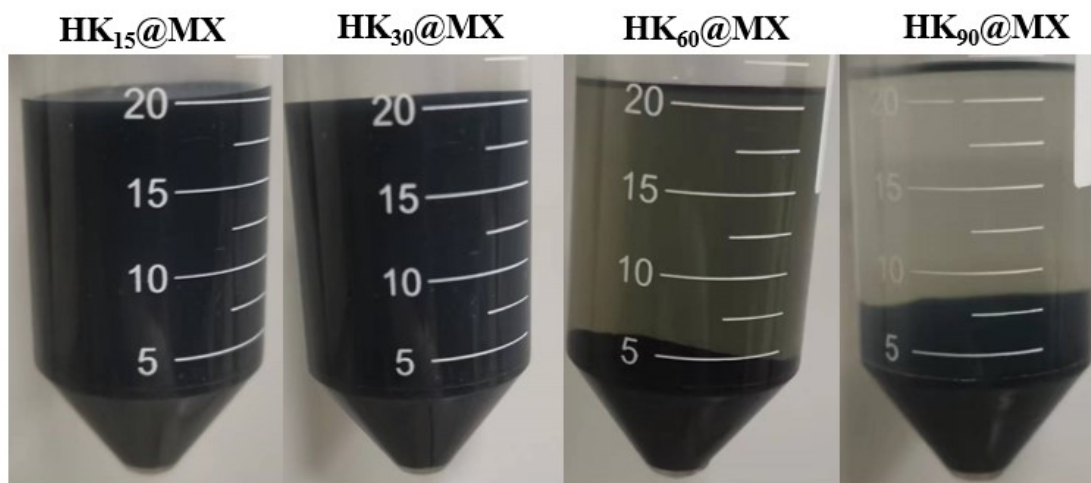

**Figure S1** After the synthesis reaction, HK<sub>15</sub>@MX, HK<sub>30</sub>@MX, HK<sub>60</sub>@MX and HK<sub>90</sub>@MX were centrifuged in 2000 rpm/min for 5 minutes. The supernatant is getting cleaner while increase the loading of HKUST-1 on the surface of Ti<sub>3</sub>C<sub>2</sub>T<sub>x</sub>. The high content of HKUST-1 on the surface of Ti<sub>3</sub>C<sub>2</sub>T<sub>x</sub> leads to the mass increase and deposition to the bottom.

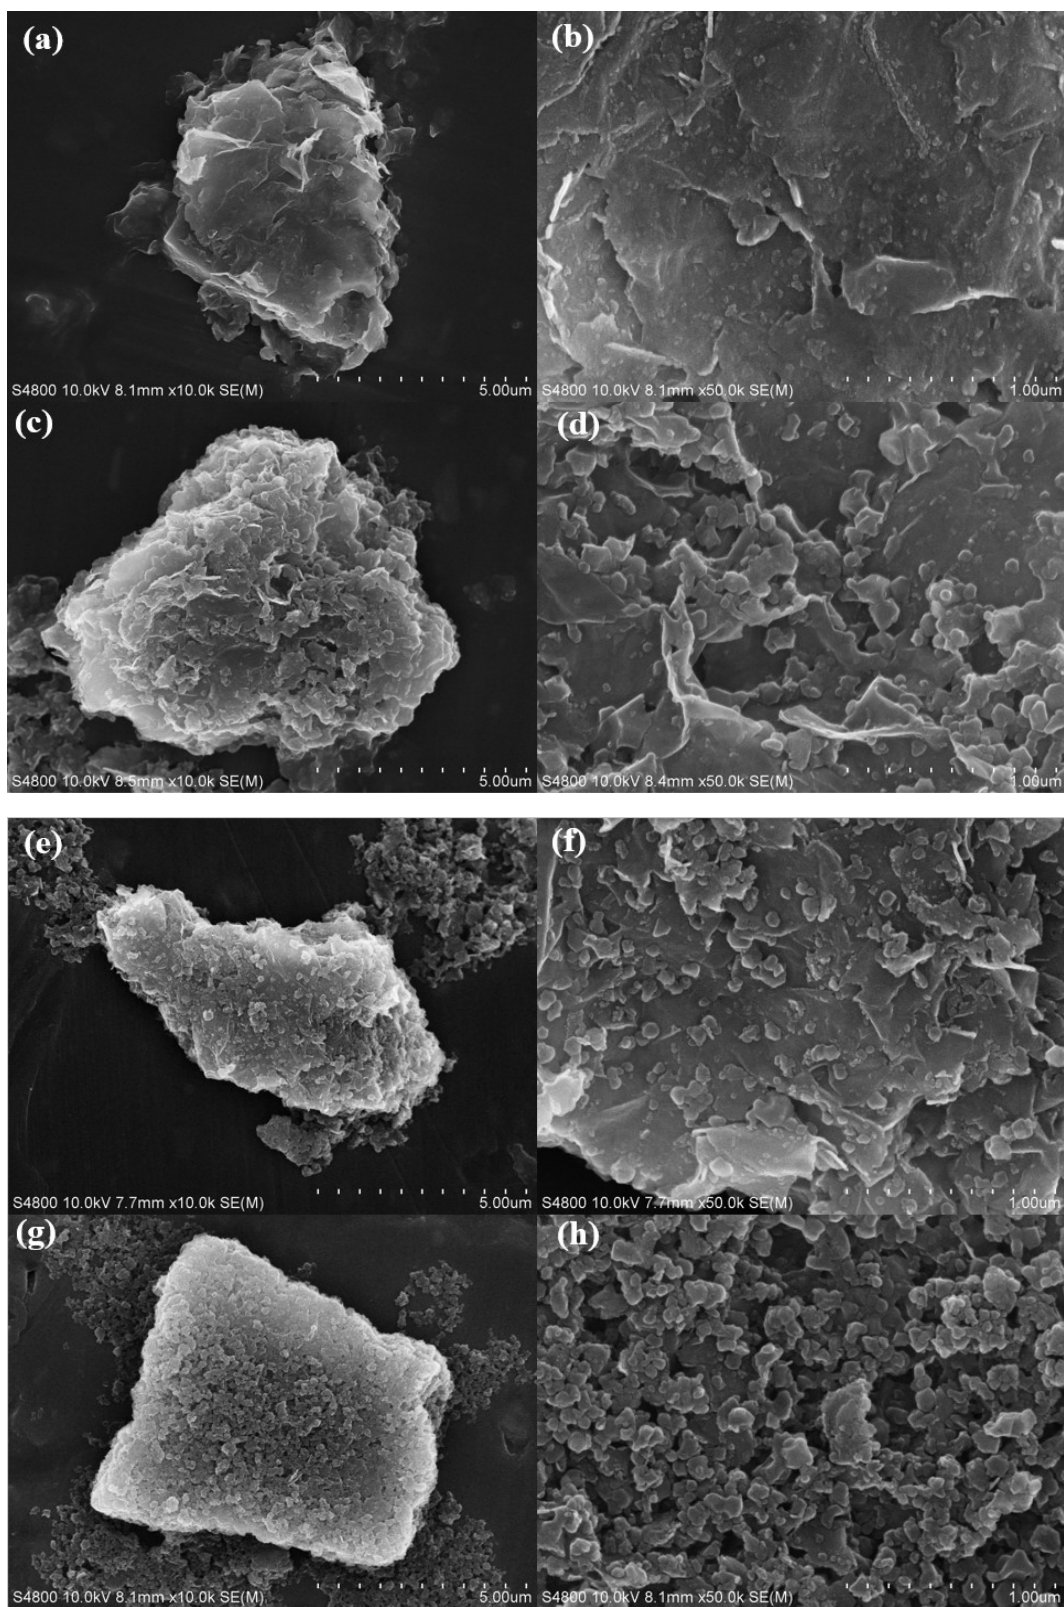

**Figure S2.** SEM images of (a-b) HK<sub>15</sub>@Ti<sub>3</sub>C<sub>2</sub>T<sub>x</sub>, (c-d) HK<sub>30</sub>@Ti<sub>3</sub>C<sub>2</sub>T<sub>x</sub>, (e-f) HK<sub>60</sub>@Ti<sub>3</sub>C<sub>2</sub>T<sub>x</sub>, (g-h) HK<sub>90</sub>@Ti<sub>3</sub>C<sub>2</sub>T<sub>x</sub>.

**Table S1** Comparison of specific surface area and pore volume of  $\text{Ti}_3\text{C}_2\text{T}_x$  and  $\text{HK@MX}$  samples

| Materials                         | BET Surface Area ( $\text{m}^2\cdot\text{g}^{-1}$ ) | Pore volume ( $\text{cm}^3\cdot\text{g}^{-1}$ ) |
|-----------------------------------|-----------------------------------------------------|-------------------------------------------------|
| $\text{Ti}_3\text{C}_2\text{T}_x$ | 11.748                                              | 2.68                                            |
| $\text{HK}_{15}\text{@MX}$        | 57.226                                              | 13.157                                          |
| $\text{HK}_{30}\text{@MX}$        | 109.45                                              | 25.149                                          |
| $\text{HK}_{60}\text{@MX}$        | 131.03                                              | 30.105                                          |
| $\text{HK}_{90}\text{@MX}$        | 186.76                                              | 42.908                                          |

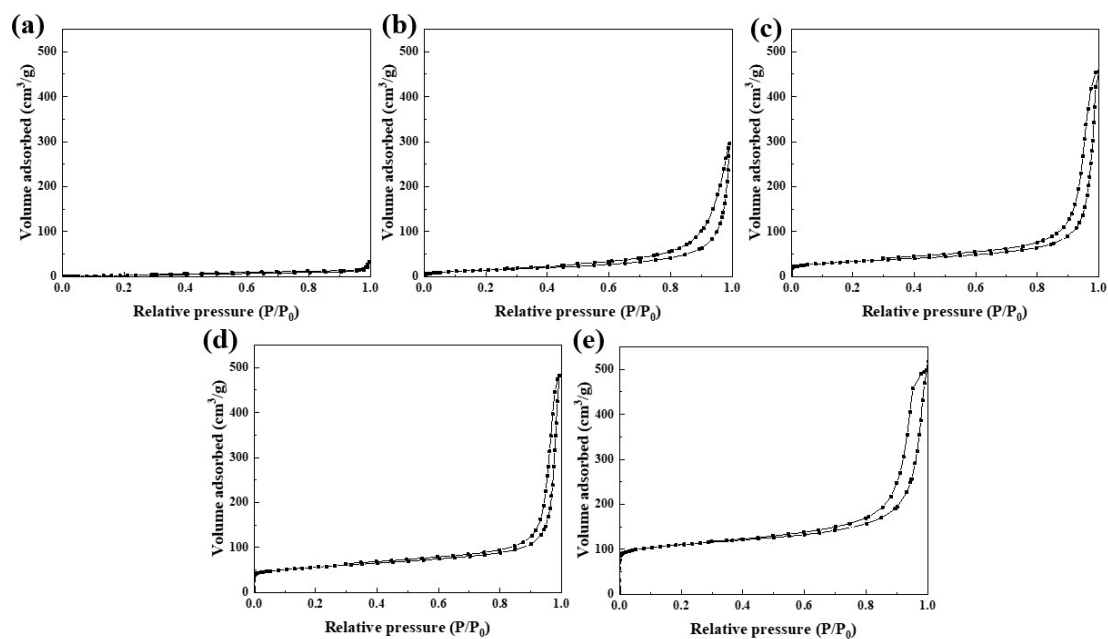**Figure S3** Nitrogen adsorption–desorption isotherms of (a)  $\text{Ti}_3\text{C}_2\text{T}_x$ , (b)  $\text{HK}_{15}\text{@Ti}_3\text{C}_2\text{T}_x$ , (c)  $\text{HK}_{30}\text{@Ti}_3\text{C}_2\text{T}_x$ , (d)  $\text{HK}_{60}\text{@Ti}_3\text{C}_2\text{T}_x$ , and (e)  $\text{HK}_{90}\text{@Ti}_3\text{C}_2\text{T}_x$ .

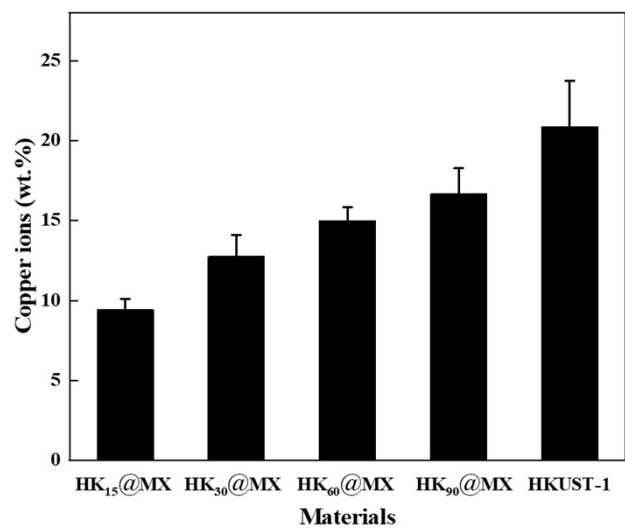

**Figure. S4.** ICP-MS analysis of Cu content in HKUST-1, HK<sub>15</sub>@MX, HK<sub>30</sub>@MX, HK<sub>60</sub>@MX and HK<sub>90</sub>@MX. (Calculation formula for measuring Cu element content= instrument reading × dilution factor × constant volume / sample quality. 10000 mg/kg = 1%.)

## Photothermal performance of HK@MX

To evaluate the photothermal properties, a near-infrared laser (808 nm, 2 W cm<sup>-2</sup>) was used to irradiate deionized water and HK@MX nanoparticles at different concentrations for 10 minutes. Dispersion temperature was monitored by a type K thermocouple (OMEGA HH309A, OMEGA Engineering Inc., Norwalk, CT, USA). To calculate the photothermal conversion efficiency of HK@MX nanoparticles, 2 mL HK@MX nanoparticle aqueous dispersion (200 μg mL<sup>-1</sup>) was irradiated continuously under the same conditions until the steady-state temperature was reached. Turn off the laser and record the temperature drop process. The photothermal conversion efficiency ( $\eta$ ) is calculated by equation (1) described by literature<sup>1</sup>:

$$\eta = \frac{hS(T_{max} - T_{surr}) - Q_s}{I(1 - 10^{-A_{808}})} \quad (1)$$

Where,  $h$  is the heat transfer coefficient,  $S$  is the surface area of the container,  $T_{max}$  is the maximum system temperature,  $T_{surr}$  is the ambient temperature,  $Q_s$  is the heat related to the optical absorbance of the solvent,  $I$  is the laser power (2 W cm<sup>-2</sup>), and  $A_{808}$  is the absorbance at HK<sub>60</sub>@MX at 808 nm. The value of  $hS$  is derived from equation (2)

$$\tau_s = \frac{m_D C_D}{hS} \quad (2)$$

Including  $\tau_s$  for sample system time constant,  $m_D$  and  $C_D$  respectively deionized water (1 g), and the quality of the heat capacity (4.2 J (g °C)<sup>-1</sup>). The  $Q_s$  value measured independently using pure water was 13.4 mW.

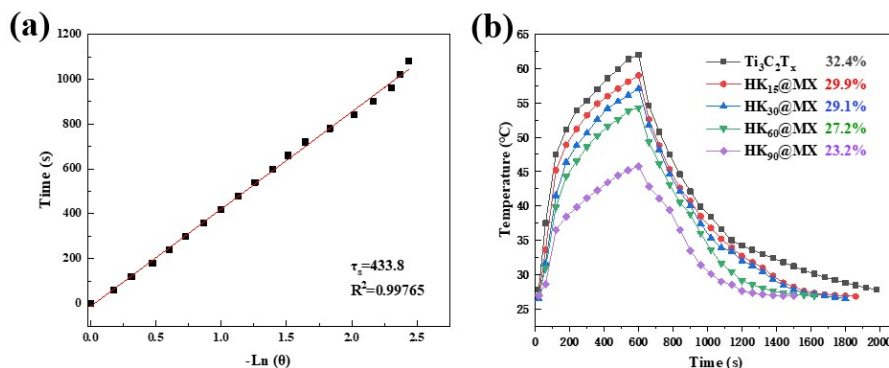

**Figure. S5.** (a) The fitting linear curve of time data vs  $-\ln\theta$  from the cooling period of HK<sub>60</sub>@MX. (b) The

heating/cooling curves of different nanoparticles with different HKUST-1 doping concentration under laser on/off.

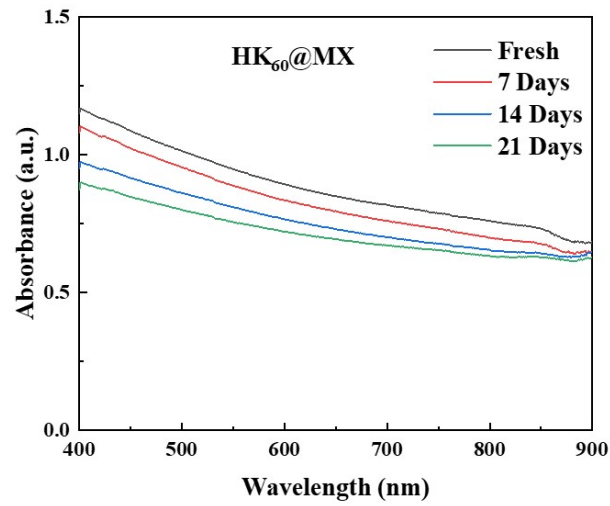

**Figure. S6.** Absorbance change of HK<sub>60</sub>@MX dispersions in DI water for 21 days.

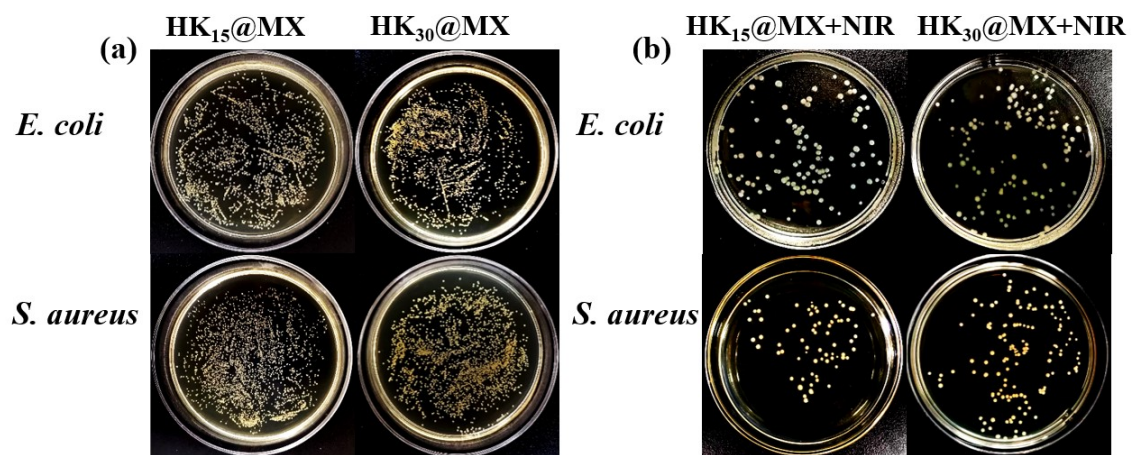

**Figure S7** In vitro antibacterial activities of HK<sub>15</sub>@MX and HK<sub>30</sub>@MX against *S. aureus* and *E. coli*. (a) kept in the dark for 10 min (200 µg/ml) (b)exposed to 808 nm light (2 W/cm<sup>2</sup>) for 10 min



**(a) Results**

|                                     | Mean (mV)            | Area (%) | St Dev (mV) |
|-------------------------------------|----------------------|----------|-------------|
| <b>Zeta Potential (mV): -27.3</b>   | <b>Peak 1: -27.3</b> | 100.0    | 5.53        |
| <b>Zeta Deviation (mV): 5.53</b>    | <b>Peak 2: 0.00</b>  | 0.0      | 0.00        |
| <b>Conductivity (mS/cm): 0.0250</b> | <b>Peak 3: 0.00</b>  | 0.0      | 0.00        |

**Result quality Good**

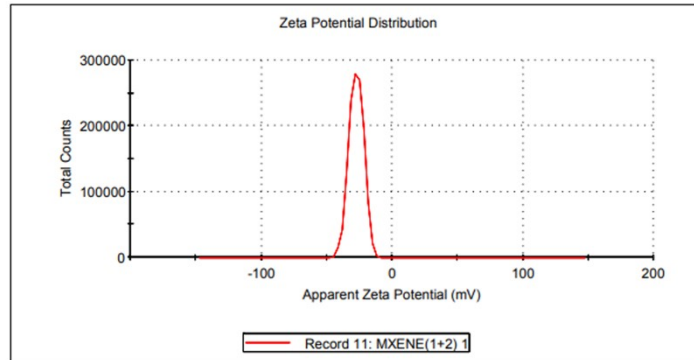

**(b) Results**

|                                     | Mean (mV)            | Area (%) | St Dev (mV) |
|-------------------------------------|----------------------|----------|-------------|
| <b>Zeta Potential (mV): -4.46</b>   | <b>Peak 1: -4.46</b> | 100.0    | 6.97        |
| <b>Zeta Deviation (mV): 6.97</b>    | <b>Peak 2: 0.00</b>  | 0.0      | 0.00        |
| <b>Conductivity (mS/cm): 0.0921</b> | <b>Peak 3: 0.00</b>  | 0.0      | 0.00        |

**Result quality Good**

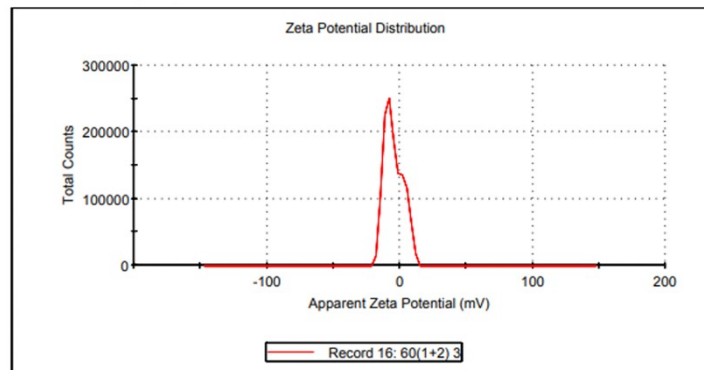

**Figure S8** Distribution of zeta potential of (a)  $\text{Ti}_3\text{C}_2\text{T}_x$  and (b)  $\text{HK}_{60}\text{@MX}$  at pH 7.5

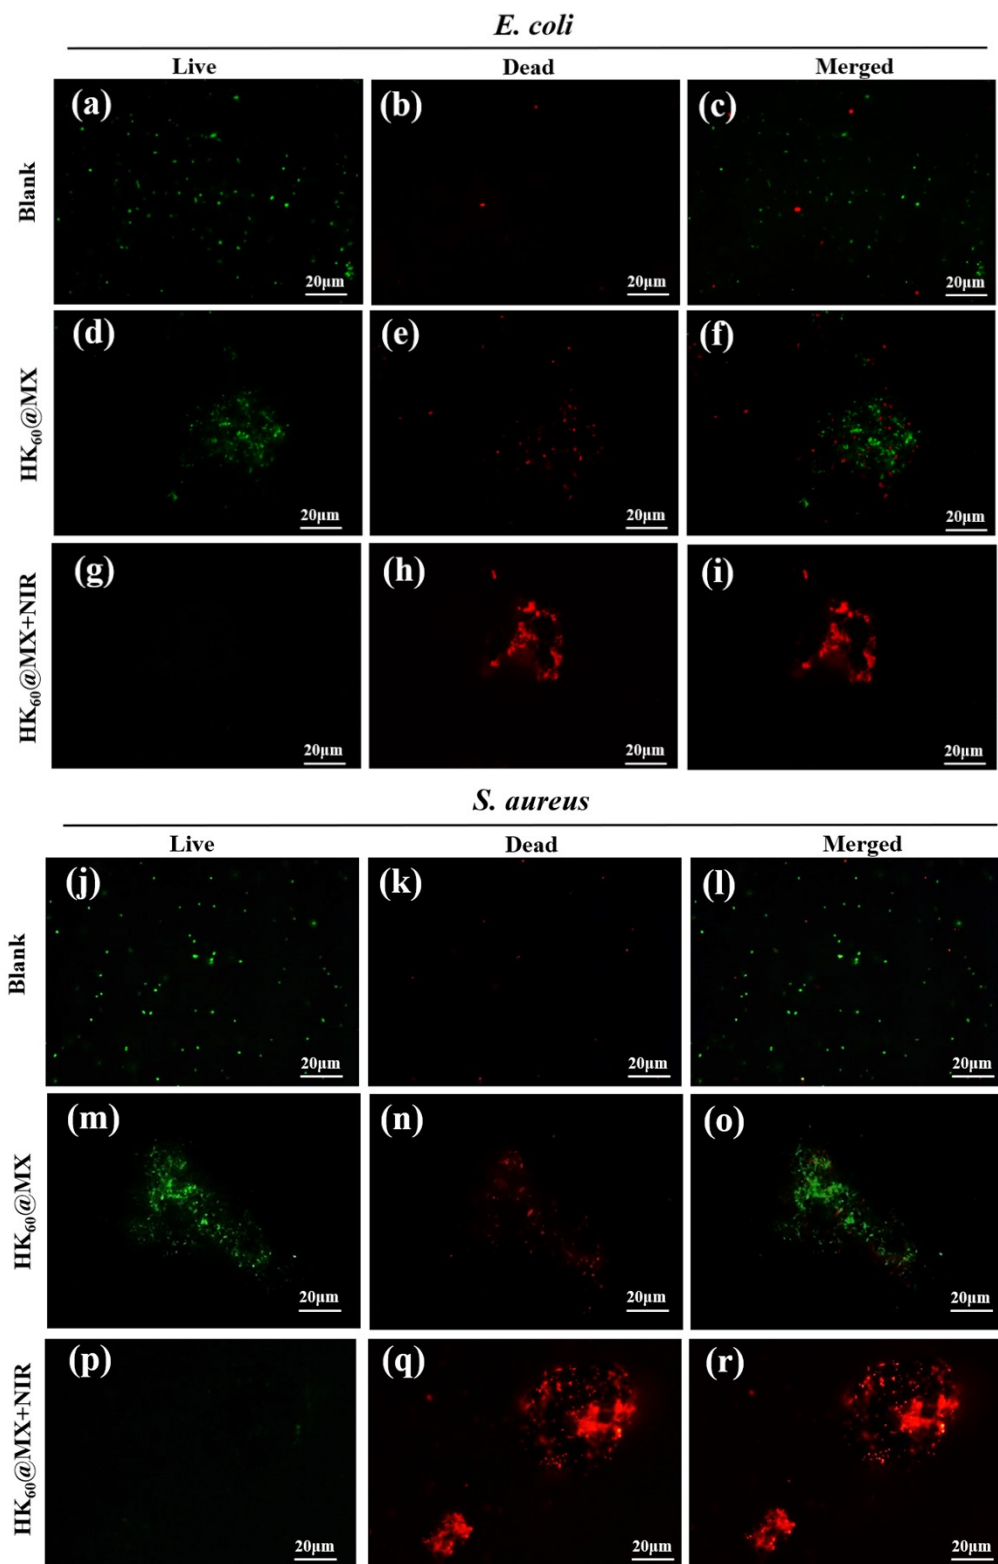

**Figure S9.** Confocal laser scanning microscopy (CLSM) images of *E. coli* (a-i) and *S. aureus* (j-r) treated with Meilungreen and PI staining. (a-c, j-l) control; (d-f, m-o) 200  $\mu\text{g}/\text{mL}$  HK<sub>60</sub>@MX; (g-i, p-r) 200 $\mu\text{g}/\text{mL}$  HK<sub>60</sub>@MX+NIR.

## Notes and references

1. Z. Chu, T. Tian, Z. Tao, J. Yang, B. Chen, H. Chen, W. Wang, P. Yin, X. Xia, H. Wang and H. Qian, *Bioactive Materials*, 2022, **17**, 71-80.
